# Supplementary material for: Evaluation of a Non-Face-to-Face Multidisciplinary Health Care Model in a Population with Rheumatoid Arthritis Vulnerable to COVID-19 in a Health Emergency Situation
Source: MDPI journal article supplement (doi:10.3390/healthcare9121744), 2021-12-17
Supplement: s1 [file s1]

## Supplementary material

**Table S1** Study dimensions and exploratory thematic questions

| Study dimensions                 | Thematic script (patients seen in face-to-face appointments)                                                                                                                                         | Thematic script (patients seen in telemedicine appointments)                                                                                                                                         | Thematic script (professionals)                                                                                                                                                                                                                        |
|----------------------------------|------------------------------------------------------------------------------------------------------------------------------------------------------------------------------------------------------|------------------------------------------------------------------------------------------------------------------------------------------------------------------------------------------------------|--------------------------------------------------------------------------------------------------------------------------------------------------------------------------------------------------------------------------------------------------------|
| Therapeutic relationship         | What was the communication with the professionals like?<br>Mention the barriers or facilitators of face-to-face consultation with respect to communicating with the professionals.                   | What was the communication with the professionals like?<br>Mention the barriers or facilitators of telemedicine with respect to communicating with the professionals.                                | What was the communication with the patients or their caregivers like? Mention the barriers or facilitators of telemedicine with respect to communicating with the patients or caregivers.                                                             |
|                                  | What was the therapeutic relationship (trust, empathy, agreements) with the professionals who treated you like?                                                                                      | What was the therapeutic relationship (trust, empathy, agreements) with the professionals who treated you like?                                                                                      | What was the therapeutic relationship with your patients or their caregivers like?                                                                                                                                                                     |
| Technological resources          | What resources do you consider necessary to be treated by telemedicine at home?                                                                                                                      | What was involved in setting up a telemedicine appointment with the IPS?                                                                                                                             | What was involved in using ICT technological resources for treatment and evaluation?                                                                                                                                                                   |
|                                  |                                                                                                                                                                                                      | What technological resources (ICTs) did you have to enable a doctor visit by telemedicine?<br>What other resources do you think would be important for implementing telemedicine?                    | What other resources do you think could optimize telemedicine?                                                                                                                                                                                         |
|                                  |                                                                                                                                                                                                      | What was involved in using technological resources (ICTs) for telemedicine from your home?                                                                                                           | Were the patient's needs met with the technological resources used?                                                                                                                                                                                    |
| Telemedicine experiences         | As a patient with rheumatoid arthritis who is being treated by regular face-to-face appointments, what has your experience been like in the context of the SARS-COV-2/COVID-19 national contingency? | As a patient with rheumatoid arthritis who is being treated by regular telemedicine appointments, what has your experience been like in the context of the SARS-COV-2/COVID-19 national contingency? | What was involved in setting up a telemedicine appointment with the IPS?<br>What was the impact of the above on the care and health outcomes of the patients you treated (adherence to therapy, complications, emergency room visits-hospitalization)? |
| Acceptability-feasibility of the | _____                                                                                                                                                                                                | Do you think that the methodology and                                                                                                                                                                | Do you think that the methodology and                                                                                                                                                                                                                  |

|                                                                                                                 |                                                             |                                                                                                                                 |                                                                                                                                                                    |
|-----------------------------------------------------------------------------------------------------------------|-------------------------------------------------------------|---------------------------------------------------------------------------------------------------------------------------------|--------------------------------------------------------------------------------------------------------------------------------------------------------------------|
| model                                                                                                           |                                                             | resources (time, materials...) in the telemedicine model were sufficient and adequate for their care/follow-up?<br>Tell us why. | resources (technical difficulties, time, materials) in the telemedicine model were sufficient and appropriate to meet the objectives of the model?<br>Tell us why. |
|                                                                                                                 |                                                             |                                                                                                                                 | What are the difficulties and obstacles to implementing a telemedicine model in the context of Bogota and the Colombian Health System?                             |
| Reasons for not accepting the telemedicine appointment (in the group that decided to see the doctor in person). | What were your reasons for not accepting telemedicine care? | _____                                                                                                                           | _____                                                                                                                                                              |

Source: prepared by authors. ICTs: information and communication technologies. IPS: Health service provider institution

**Table S2** Changes in medicine by group from model to model, and in the group as a whole

|                    | Medicines used in the telemedicine model |      |                 |      |                 |      | <i>p</i> -value |
|--------------------|------------------------------------------|------|-----------------|------|-----------------|------|-----------------|
|                    |                                          |      |                 |      |                 |      |                 |
|                    | Visit 1<br>n=71                          |      | Visit 2<br>n=71 |      | Visit 3<br>n=71 |      |                 |
|                    | Frequency                                | (%)  | Frequency       | (%)  | Frequency       | (%)  |                 |
| Analgesics         |                                          |      |                 |      |                 |      |                 |
| Acetaminophen      | 49                                       | 69,0 | 24              | 33,8 | 41              | 57,7 | 0,345           |
| Amitriptyline      | 0                                        | 0,0  | 0               | 0,0  | 0               | 0,0  |                 |
| Codeine            | 2                                        | 2,8  | 4               | 5,6  | 3               | 4,2  | 1,000           |
| Duloxetine         | 0                                        | 0,0  | 0               | 0,0  | 0               | 0,0  |                 |
| Hydrocodone        | 8                                        | 11,3 | 6               | 8,5  | 3               | 4,2  | 0,337           |
| Oxycodone          | 0                                        | 0,0  | 0               | 0,0  | 0               | 0,0  |                 |
| Pregabalin         | 2                                        | 2,8  | 1               | 1,4  | 1               | 1,4  | 1,000           |
| Tramadol           | 5                                        | 7,0  | 3               | 4,2  | 3               | 4,2  | 0,795           |
| Trazodone          | 1                                        | 1,4  | 1               | 1,4  | 1               | 1,4  | 1,000           |
| Antimalarials      |                                          |      |                 |      |                 |      |                 |
| Chloroquine        | 6                                        | 8,5  | 6               | 8,5  | 5               | 7,0  | 0,938           |
| Hydroxychloroquine | 0                                        | 0,0  | 0               | 0,0  | 0               | 0,0  |                 |
| b/ts DMARDs        |                                          |      |                 |      |                 |      |                 |
| Abatacept          | 0                                        | 0,0  | 0               | 0,0  | 0               | 0,0  |                 |
| Adalimumab         | 2                                        | 2,8  | 2               | 2,8  | 2               | 2,8  | 1,0             |
| Certolizumab       | 6                                        | 8,5  | 6               | 8,5  | 6               | 8,5  | 1,0             |
| Etanercept         | 10                                       | 14,1 | 9               | 12,7 | 10              | 14,1 | 1,0             |
| Golimumab          | 5                                        | 7,0  | 5               | 7,0  | 5               | 7,0  | 1,0             |
| Infliximab         | 0                                        | 0,0  | 1               | 1,4  | 1               | 1,4  | 1,0             |
| Rituximab          | 1                                        | 1,4  | 0               | 0,0  | 0               | 0,0  | 1,0             |
| Tocilizumab        | 1                                        | 1,4  | 1               | 1,4  | 1               | 1,4  | 1,0             |
| Tofacitinib        | 3                                        | 4,2  | 4               | 5,6  | 4               | 5,6  | 1,0             |
| csDMARDs           |                                          |      |                 |      |                 |      |                 |
| Azathioprine       | 0                                        | 0,0  | 0               | 0,0  | 0               | 0,0  |                 |
| Leflunomide        | 38                                       | 53,5 | 38              | 53,5 | 36              | 50,7 | 0,927           |

|                  |    |      |    |      |    |      |       |
|------------------|----|------|----|------|----|------|-------|
| Methotrexate     | 40 | 56,3 | 39 | 54,9 | 35 | 49,3 | 0,673 |
| Mycophenolate    | 0  | 0,0  | 0  | 0,0  | 0  | 0,0  |       |
| Sulfasalazine    | 9  | 12,7 | 9  | 12,7 | 7  | 9,9  | 0,834 |
| GCs              |    |      |    |      |    |      |       |
| Betamethasone    | 5  | 7,0  | 4  | 5,6  | 1  | 1,4  | 0,353 |
| Deflazacort      | 3  | 4,2  | 3  | 4,2  | 3  | 4,2  | 1,000 |
| Methylprednisone | 0  | 0,0  | 0  | 0,0  | 0  | 0,0  |       |
| Prednisone       | 40 | 56,3 | 40 | 56,3 | 33 | 46,5 | 0,397 |

#### Additional medicines in the whole group of patients

|               | Visit 1<br>n=218 |     | Visit 2<br>n=201 |     | Visit 3<br>n=206 |     | p-value |
|---------------|------------------|-----|------------------|-----|------------------|-----|---------|
|               | Frequency        | (%) | Frequency        | (%) | Frequency        | (%) |         |
| Analgesics    |                  |     |                  |     |                  |     |         |
| Amitriptyline | 1                | 0,5 | 0                | 0,0 | 1                | 0,5 | 1       |
| Duloxetine    | 1                | 0,5 | 0                | 0,0 | 0                | 0,0 | 1       |
| Pregabalin    | 6                | 2,8 | 6                | 3,0 | 4                | 1,9 | 0,815   |
| Trazodone     | 12               | 5,5 | 11               | 5,5 | 9                | 4,4 | 0,837   |

#### Changes in medicines by group in the whole group of patients

|            | Visit 2   |     | Visit 3   |     | p-value |
|------------|-----------|-----|-----------|-----|---------|
|            | n=200     |     | n=177     |     |         |
|            | Frequency | (%) | Frequency | (%) |         |
| Analgesics |           |     |           |     | 0,023   |
| NP/WC      | 152       | 76  | 131       | 74  |         |
| Increase   | 17        | 8,5 | 8         | 4,5 |         |

|                                                   |     |      |     |      |       |
|---------------------------------------------------|-----|------|-----|------|-------|
| Decrease                                          | 9   | 4,5  | 5   | 2,8  |       |
| Start                                             | 3   | 1,5  | 15  | 8,5  |       |
| Discontinue                                       | 12  | 6    | 12  | 6,8  |       |
| <b>Switching to another within the same class</b> | 7   | 3,5  | 6   | 3,4  |       |
| b/ts DMARDs                                       |     |      |     |      | 0,260 |
| NP/WC                                             | 191 | 95,4 | 168 | 94,8 |       |
| Increase                                          | 0   | 0    | 1   | 0,6  |       |
| Decrease                                          | 0   | 0    | 0   | 0    |       |
| Start                                             | 3   | 1,5  | 6   | 3,4  |       |
| Discontinue                                       | 5   | 2,5  | 1   | 0,6  |       |
| <b>Switching to another within the same class</b> | 1   | 0,6  | 1   | 0,6  |       |
| csDMARDs                                          |     |      |     |      | 0,234 |
| NP/WC                                             | 161 | 80,5 | 147 | 83   |       |
| Increase                                          | 14  | 7    | 7   | 4    |       |
| Decrease                                          | 11  | 5,5  | 9   | 5,1  |       |
| Start                                             | 3   | 1,5  | 7   | 4    |       |
| Discontinue                                       | 10  | 5    | 4   | 2,2  |       |
| <b>Switching to another within the same class</b> | 1   | 0,5  | 3   | 1,7  |       |
| GCs                                               |     |      |     |      | 0,889 |
| NP/WC                                             | 174 | 87   | 151 | 85,3 |       |
| Increase                                          | 10  | 5    | 10  | 5,7  |       |
| Decrease                                          | 8   | 4    | 11  | 6,2  |       |
| Start                                             | 5   | 2,5  | 4   | 2,3  |       |
| Discontinue                                       | 2   | 1    | 1   | 0,6  |       |
| <b>Switching to another within the same class</b> | 1   | 0,6  | 0   | 0    |       |

NP/WC: non-prescribed /Without changes

**Table S3** Changes in Drug Categories during follow up in the five sub-groups of patients analyzed

|                   | Telemedicine model |                 |             | Face-to-face usual care model |                 |             | Face-to-face Usual Care model > Telemedicine model> Telemedicine model |                  |             | Telemedicine model > Telemedicine model> face-to-face Usual Care model |                  |             | Face-to-face Usual Care model > Telemedicine model > face-to-face Usual Care model |                  |             |
|-------------------|--------------------|-----------------|-------------|-------------------------------|-----------------|-------------|------------------------------------------------------------------------|------------------|-------------|------------------------------------------------------------------------|------------------|-------------|------------------------------------------------------------------------------------|------------------|-------------|
|                   | Visit 2<br>n=71    | visit 3<br>n=63 |             | Visit 2<br>n=18               | Visit 3<br>n=15 |             | Visit 2<br>n= 48                                                       | Visit 3<br>n= 38 |             | Visit 2<br>n= 17                                                       | Visit 3<br>n= 18 |             | Visit 2 n= 23                                                                      | Visit 3<br>n= 23 |             |
|                   | n (%)              | n (%)           | p<br>value* | n (%)                         | n (%)           | p<br>value* | n (%)                                                                  | n (%)            | p<br>value* | n (%)                                                                  | n (%)            | p<br>value* | n (%)                                                                              | n (%)            | p<br>value* |
| <b>Analgesics</b> |                    |                 | 0.001       |                               |                 | 0.659       |                                                                        |                  | 0.175       |                                                                        |                  | 0.689       |                                                                                    |                  | 1.000       |
| NP/WC             | 61<br>(85.9)       | 42<br>(66.6)    |             | 12<br>(66.7)                  | 10(66<br>.5)    |             | 33<br>(68.8)                                                           | 28<br>(73.7)     |             | 13(76.<br>5)                                                           | 15<br>(83.3)     |             | 17 (73.8)                                                                          | 17<br>(73.8)     |             |
| Increase          | 5 (7.1)            | 3 (4.8)         |             | 3<br>(16.7)                   | 1<br>(6.7)      |             | 4 (8.3)                                                                | 1 (2.6)          |             | 1 (5.9)                                                                | 2<br>(11.1)      |             | 2 (8.7)                                                                            | 1 (4.4)          |             |
| Decrease          | 2 (2.8)            | 0 (0)           |             | 2<br>(11.1)                   | 1<br>(6.7)      |             | 2 (4.2)                                                                | 2 (5.3)          |             | 1 (5.9)                                                                | 1 (5.6)          |             | 1 (4.4)                                                                            | 1 (4.4)          |             |
| Start             | 0 (0)              | 8 (12.7)        |             | 0 (0)                         | 1<br>(6.7)      |             | 2 (4.2)                                                                | 5<br>(13.2)      |             | 0 (0)                                                                  | 0 (0)            |             | 0 (0)                                                                              | 1 (4.4)          |             |

|                                            |           |           |       |          |           |           |           |           |       |           |           |       |           |           |       |
|--------------------------------------------|-----------|-----------|-------|----------|-----------|-----------|-----------|-----------|-------|-----------|-----------|-------|-----------|-----------|-------|
| Discontinue                                | 2 (2.8)   | 7 (11.1)  |       | 0 (0)    | 1 (6.7)   |           | 5 (10.4)  | 0 (0)     |       | 2 (11.8)  | 0 (0)     |       | 2 (8.7)   | 3 (13)    |       |
| Switching to another within the same class | 1 (1.4)   | 3 (4.8)   |       | 1 (5.5)  | 1 (6.7)   |           | 2 (4.2)   | 2 (5.3)   |       | 0 (0)     | 0(0)      |       | 1 (4.4)   | 0 (0)     |       |
| <b>b/ts DMARDs</b>                         |           |           | 1.000 |          |           | 1.00<br>0 |           |           | 0.195 |           |           | 0.514 |           |           | 0.739 |
| NP/WC                                      | 68 (95.8) | 62 (98.4) |       | 18 (100) | 15 (100)  |           | 44 (91.7) | 35 (92.1) |       | 17 (100)  | 17 (94.4) |       | 21 (91.2) | 20 (86.9) |       |
| Increase                                   | 0 (0)     | 0(0)      |       | 0 (0)    | 0 (0)     |           | 0 (0)     | 0 (0)     |       | 0 (0)     | 1 (5.6)   |       | 0 (0)     | 0 (0)     |       |
| Decrease                                   | 0 (0)     | 0 (0)     |       | 0 (0)    | 0 (0)     |           | 0 (0)     | 0 (0)     |       | 0 (0)     | 0 (0)     |       | 0 (0)     | 0 (0)     |       |
| Start                                      | 2(2.8)    | 1(1.6)    |       | 0 (0)    | 0 (0)     |           | 1 (2.1)   | 3 (7.9)   |       | 0 (0)     | 0 (0)     |       | 0 (0)     | 2 (8.7)   |       |
| Discontinue                                | 1(1.4)    | 0 (0)     |       | 0 (0)    | 0 (0)     |           | 3 (6.3)   | 0 (0)     |       | 0 (0)     | 0 (0)     |       | 1 (4.4)   | 1 (4.4)   |       |
| Switching to another within the same class | 0 (0)     | 0 (0)     |       | 0 (0)    | 0 (0)     |           | 0 (0)     | 0 (0)     |       | 0 (0)     | 0 (0)     |       | 1 (4.4)   | 0 (0)     |       |
| <b>cs DMARDs</b>                           |           |           | 0.093 |          |           | 0.68<br>5 |           |           | 0.125 |           |           | 1.000 |           |           | 1.000 |
| NP/WC                                      | 67(94.4)  | 52(82.5)  |       | 9 (50)   | 11 (73.3) |           | 36 (75)   | 30 (79)   |       | 14 (82.4) | 15 (83.3) |       | 20 (86.9) | 20 (86.8) |       |
| Increase                                   | 1 (1.4)   | 3 (4.8)   |       | 4 (22.2) | 2 (13.3)  |           | 2 (4.2)   | 0 (0)     |       | 2 (11.8)  | 1 (5.6)   |       | 2 (8.7)   | 1 (4.4)   |       |
| Decrease                                   | 1 (1.4)   | 4 (6.3)   |       | 2 (11.1) | 1 (6.7)   |           | 7 (14.6)  | 2 (5.3)   |       | 0 (0)     | 1 (5.6)   |       | 0 (0)     | 0 (0)     |       |
| Start                                      | 0 (0)     | 3 (4.8)   |       | 1 (5.6)  | 0 (0)     |           | 0 (0)     | 2 (5.3)   |       | 1 (5.9)   | 1 (5.6)   |       | 0 (0)     | 1 (4.4)   |       |
| Discontinue                                | 1 (1.4)   | 0 (0)     |       | 2 (11.1) | 1 (6.7)   |           | 3 (6.3)   | 2 (5.3)   |       | 0 (0)     | 0 (0)     |       | 1 (4.4)   | 1 (4.4)   |       |

|                                            |           |           |       |           |           |       |           |           |       |          |           |       |           |           |       |
|--------------------------------------------|-----------|-----------|-------|-----------|-----------|-------|-----------|-----------|-------|----------|-----------|-------|-----------|-----------|-------|
| Switching to another within the same class | 1 (1.4)   | 1 (1.6)   |       | 0 (0)     | 0 (0)     |       | 0 (0)     | 2 (5.3)   |       | 0 (0)    | 0 (0)     |       | 0 (0)     | 0 (0)     |       |
| <b>GCs</b>                                 |           |           | 0.705 |           |           | 0.698 |           |           | 0.755 |          |           | 0.229 |           |           | 0.577 |
| NP/WC                                      | 69 (97.2) | 59 (93.7) |       | 14 (77.8) | 11(73 .3) |       | 41 (85.4) | 32 (84.2) |       | 17 (100) | 15 (83.3) |       | 16 (69.6) | 18 (78.3) |       |
| Increase                                   | 1 (1.4)   | 1 (1.6)   |       | 1 (5.5)   | 2 (13.3)  |       | 1 (2)     | 2 (5.3)   |       | 0 (0)    | 3 (16.7)  |       | 3 (13.1)  | 0 (0)     |       |
| Decrease                                   | 1(1.4)    | 2 (3.1)   |       | 2 (1.1)   | 2 (13.3)  |       | 3 (6.3)   | 3 (7.9)   |       | 0 (0)    | 0 (0)     |       | 2 (8.7)   | 2 (8.7)   |       |
| Start                                      | 0 (0)     | 1 (1.6)   |       | 1 (5.6)   | 0 (0)     |       | 3 (6.3)   | 1 (2.6)   |       | 0 (0)    | 0 (0)     |       | 1 (4.4)   | 2 (8.7)   |       |
| Discontinue                                | 0 (0)     | 0 (0)     |       | 0 (0)     | 0 (0)     |       | 0 (0)     | 0 (0)     |       | 0 (0)    | 0 (0)     |       | 1 (4.4)   | 1 (4.4)   |       |
| Switching to another within the same class | 0 (0)     | 0 (0)     |       | 0 (0)     | 0 (0)     |       | 0 (0)     | 0(0)      |       | 0 (0)    | 0 (0)     |       | 0 (0)     | 0 (0)     |       |

Switched drugs categories during follow up in the five groups of patients analyzed. \*Statistical differences were determined to be significant at p-values less than 0.05. >: Transition between models; b/ts DMARDs: biological/targeted synthetic Disease-modifying antirheumatic drugs; csDMARDs: conventional synthetic Disease-modifying antirheumatic drugs; GCs: Glucocorticoids; NP/WC NP: non prescribed or WC: Without change. See description of the whole group at supplementary file 1: Table S1.



**Table S4** Outcomes and RA treatment description of patients who were infected by SARS-Cov2.

>: Transition between models; AF: Atrial fibrillation; AH: Arterial Hypertension; bDMARDs: biological Disease-modifying antirheumatic drugs; COPD: Chronic Obstructive Pulmonary Disease; CQ: Chloroquine; CTG: Chronic tophaceous gout; ETN: Etanercept; GLM:

| Case No. | Sex | Age | Duration of RA (years) | Consultation model | RA treatment                                        | Comorbidities                                                        | Clinical course of SARS-Cov2 infection | Outcomes          | Observation                                                         |
|----------|-----|-----|------------------------|--------------------|-----------------------------------------------------|----------------------------------------------------------------------|----------------------------------------|-------------------|---------------------------------------------------------------------|
| 1        | F   | 66  | 23                     | TM                 | bDMARD (ETN) + Prednisone + MTX                     | AH - OA – AF                                                         | Hospitalized                           | Complete recovery | AH without treatment – AF treatment with rivaroxaban                |
| 2        | F   | 81  | 1                      | UC>TM>UC           | bDMARD (RTX) + Prednisone                           | AH – Osteoporosis – OA – Hypothyroidism                              |                                        |                   |                                                                     |
| 3        | F   | 66  | 45                     | UC                 | SSZ+Prednisone                                      | AH                                                                   |                                        |                   |                                                                     |
| 4        | F   | 59  | 16                     | UC>TM>TM           | MTX+LFN+Prednisone+ bDMARD (GLM)                    | OA - Hypothyroidism – Epilepsy – Depressive disorder – LTBI treated. | At home                                | Complete recovery | Two months with positive sample. Two samples positive? Reinfection? |
| 5        | M   | 65  | 6                      | UC>TM>UC           | MTX+LFN+Prednisone + Betamethasone (single dose IM) | AH – OA – EP – PCa – Colonic polyps                                  | Asymptomatic                           | Complete recovery | Pre-operative sample was positive. Before                           |

Golimumab; IM: Intramuscular injection; LFN: Leflunomide; LTBI: Latent Tuberculosis infection; MTX: Methotrexate; OA:

|   |   |    |          |          |                       |                                                                                       |                             |                                       |                                       |
|---|---|----|----------|----------|-----------------------|---------------------------------------------------------------------------------------|-----------------------------|---------------------------------------|---------------------------------------|
|   |   |    |          |          |                       |                                                                                       |                             |                                       | schedule surgery<br>had positive test |
| 6 | M | 68 | 29       | UC>TM>TM | LFN+Prednisone        | AH – Type 2<br>Diabetes<br>Mellitus – OA –<br>Osteoporosis -<br>Chronic<br>gastritis. |                             | Complete<br>recovery                  |                                       |
| 7 | M | 73 | 14 years | UC>TM    | SSZ+Prednisone<br>+CQ | AH – COPD-<br>OA –<br>Osteoporosis -<br>CTG                                           | Hospitalized<br>seven days. | Died due to<br>pulmonary<br>involment |                                       |

Osteoarthritis; PCa: Prostate cancer; PE: Pulmonary embolism; RA: Rheumatoid Arthritis; RTX: Rituximab; SARS-Cov2: Severe acute respiratory syndrome coronavirus 2; SSZ: Sulfasalazine; TM: Telemedicine model; UC: Face-to-face usual care model.
